# Supplementary material
Source: publisher figshare collection journal article supplement (https://sage.figshare.com/ndownloader/files/23706838)
Supplement: Supplementary file 1 [file 23706838]

**Supplementary files:**

**Tamponade A4C** – A4C view of large pericardial effusion with echocardiographic signs of tamponade

**Tamponade PSAX** – Pericardial fluid visible in PSAX view

**PE 1 PLAX** – PLAX view of acute PE with dilated RV and septal bowing

**PE 2 PSAX** – PSAX view of acute PE with dilated RV and septal bowing

**Subcostal Midpap SAX** – SAX mid papillary view from the SC window

**Double barrelled echo view** – Transhepatic simultaneous coronal view of IVC and abdominal aorta
